# Supplementary material for: Lifetime risk and years lost to type 1 and type 2 diabetes in Denmark, 1996–2016
Source: PubMed Central journal article supplement — BMJ Open Diabetes Res Care. 2021 Mar 2;9(1):e001065. doi: 10.1136/bmjdrc-2019-001065 (PMC7929801; doi:10.1136/bmjdrc-2019-001065), 2021-03-02
Supplement: bmjdrc-2019-001065supp002.pdf [file bmjdrc-2019-001065supp002.pdf]

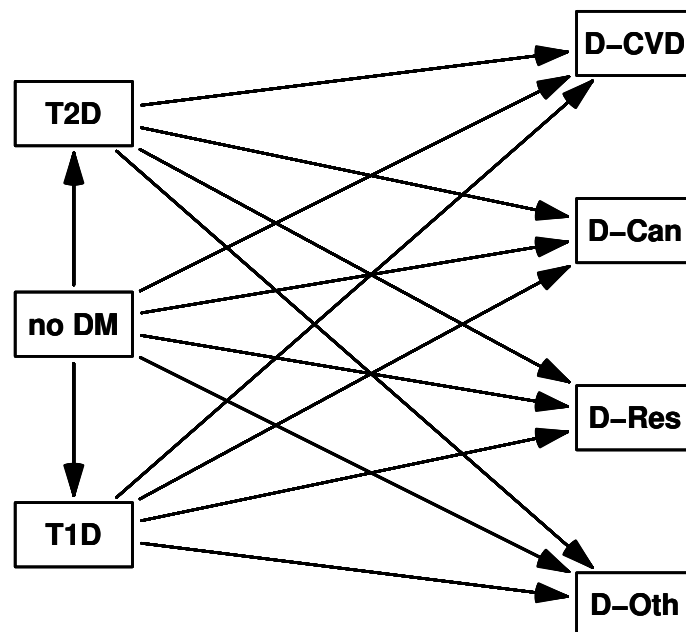

Figure ESM 1: Multistate model used to compute the survival probabilities of persons in each of the states "no DM", "T1D" and "T2D". The righthand states refer to death from cardiovascular disease ("D-CVD"), cancer ("D-Can"), respiratory causes ("D-Res") and causes ("D-Oth"). For persons in "T1D" and "T2D" the survival is just the probability of remaining in the state. For persons in state "no DM" at given age the survival is the probability of being in either of the states "no DM", "T1D" and "T2D".

Thus,
