# Supplementary material for: Lifetime risk and years lost to type 1 and type 2 diabetes in Denmark, 1996–2016
Source: PubMed Central journal article supplement — BMJ Open Diabetes Res Care. 2021 Mar 2;9(1):e001065. doi: 10.1136/bmjdrc-2019-001065 (PMC7929801; doi:10.1136/bmjdrc-2019-001065), 2021-03-02
Supplement: bmjdrc-2019-001065supp003.pdf [file bmjdrc-2019-001065supp003.pdf]

## Figures

15

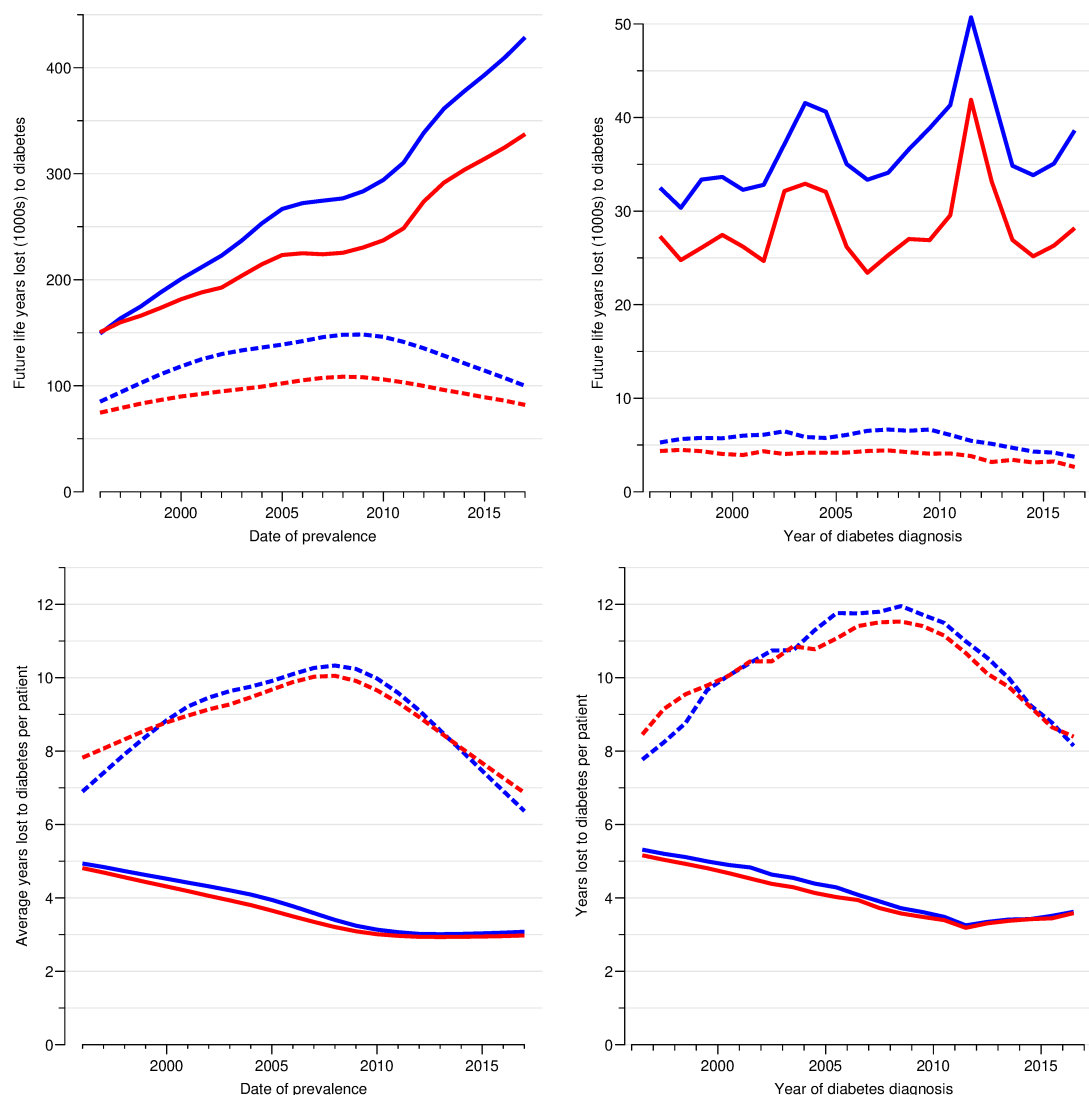

Figure ESM 2: *Upper panels* Total future years of life lost among all currently prevalent diabetes patients at each 1 January (left) and among newly diagnosed patients during calendar year (right).

*Lower panels* Average future years of life lost among currently prevalent diabetes patients each 1 January (left) and among patients diagnosed during each calendar year (right). Red lines are women, blue lines are men, broken lines are type 1 diabetes and solid lines are full type 2 diabetes.
