# Supplementary material for: Lifetime risk and years lost to type 1 and type 2 diabetes in Denmark, 1996–2016
Source: PubMed Central journal article supplement — BMJ Open Diabetes Res Care. 2021 Mar 2;9(1):e001065. doi: 10.1136/bmjdrc-2019-001065 (PMC7929801; doi:10.1136/bmjdrc-2019-001065), 2021-03-02
Supplement: bmjdrc-2019-001065supp007.pdf [file bmjdrc-2019-001065supp007.pdf]

## Figures

19

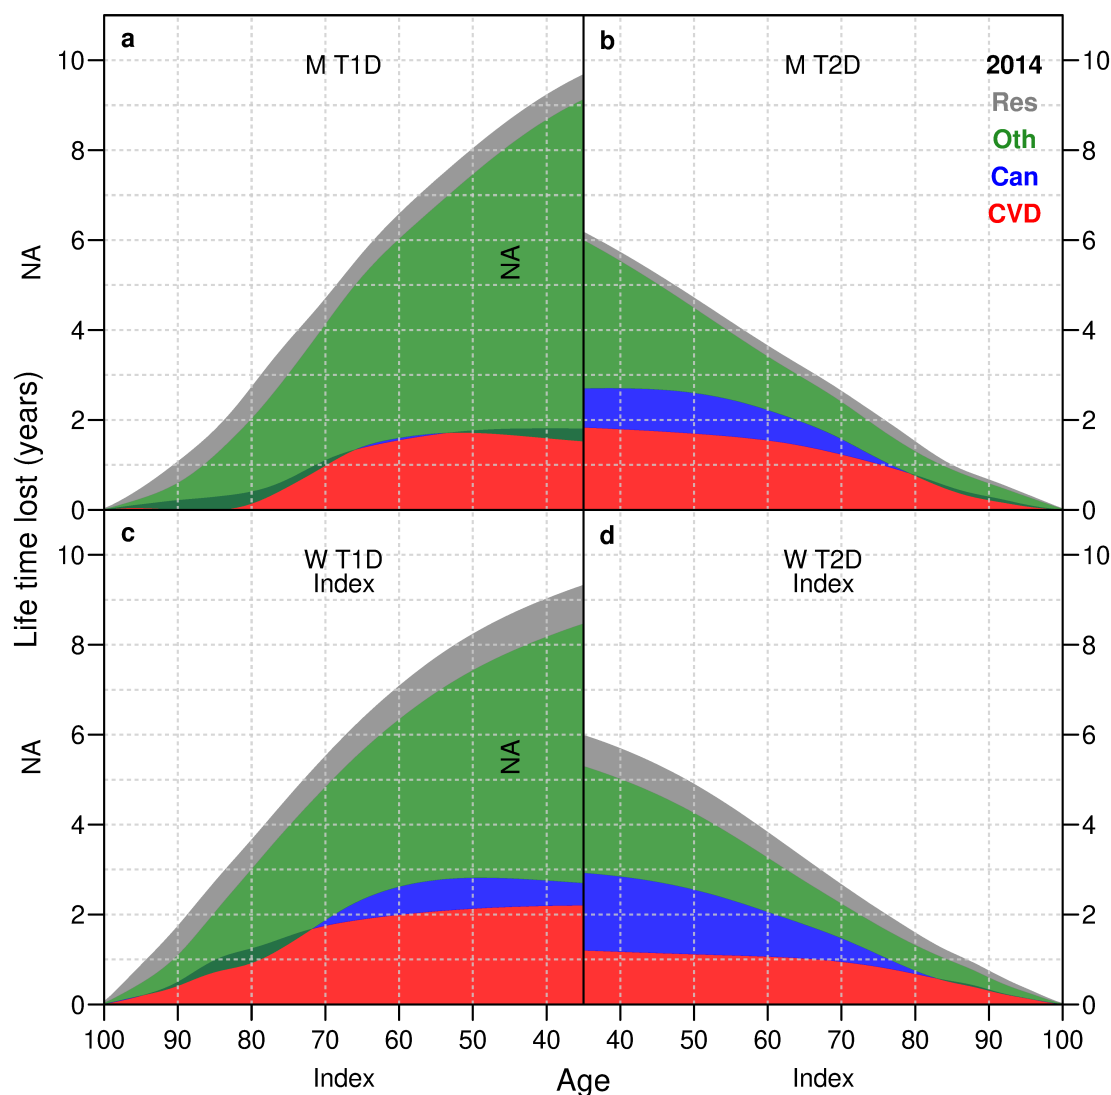

Figure ESM 6: Years of life lost to different causes of death at 1 January 2014 by sex, type of diabetes and age.

The dark green areas in panels a and c is equal to the negative years of life lost to cardiovascular disease in type 1 diabetes patients (it is the overlap of red, blue and gray areas), therefore part of both the CVD and the Other component.

a: Men, type 1 diabetes; b: Men, type 2 diabetes; c: Women, type 1 diabetes; d: Women, type 2 diabetes.

Colors: gray: Respiratory causes; green: other causes; blue: cancer; red: CVD.
