# Supplementary material for: Lifetime risk and years lost to type 1 and type 2 diabetes in Denmark, 1996–2016
Source: PubMed Central journal article supplement — BMJ Open Diabetes Res Care. 2021 Mar 2;9(1):e001065. doi: 10.1136/bmjdrc-2019-001065 (PMC7929801; doi:10.1136/bmjdrc-2019-001065), 2021-03-02
Supplement: bmjdrc-2019-001065supp009.pdf [file bmjdrc-2019-001065supp009.pdf]

Figures

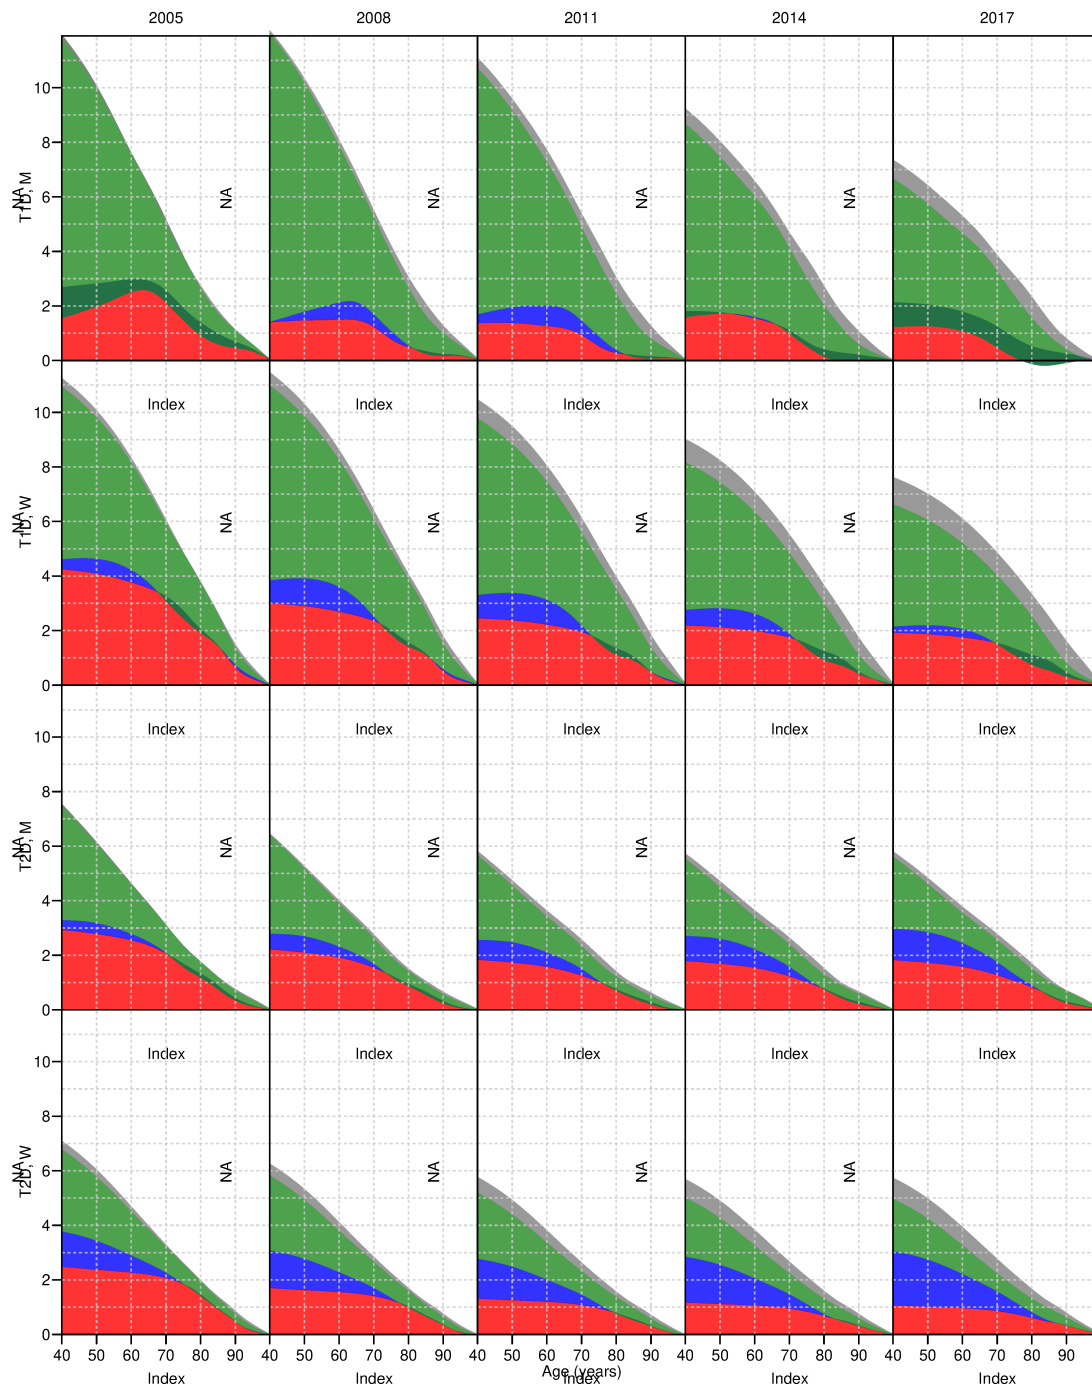

Figure ESM 8: Years of life lost to different causes of death by date (1 January each year), sex, type of diabetes and age. Colours indicate cause of death: red: CVD; blue: cancer; green: other causes; dark green: respiratory causes. The dark green area is overlaid on the red, blue (negative) and green areas. This area is therefore part of both the CVD and the Other component.
