# Supplementary material for: Lifetime risk and years lost to type 1 and type 2 diabetes in Denmark, 1996–2016
Source: PubMed Central journal article supplement — BMJ Open Diabetes Res Care. 2021 Mar 2;9(1):e001065. doi: 10.1136/bmjdrc-2019-001065 (PMC7929801; doi:10.1136/bmjdrc-2019-001065), 2021-03-02
Supplement: bmjdrc-2019-001065supp010.pdf [file bmjdrc-2019-001065supp010.pdf]

## Tables

7

Table ESM 1: Events (diabetes diagnoses and deaths) and person-years (in 1000s) in the Danish population in the 21 year study period 1996-2016, provided by current diabetes status.

The three parts of the P-years column correspond to the person-years (in 1000s) in the leftmost boxes (noDM, T1D, T2D) in figure ESM 1.14 combinations of type of diabetes (2 types) and cause of death (4 causes) on one hand and status (noDM, T1D, T2D) on the other hand correspond to the events (arrows) in figure ESM 1.1. Of ESM 1.1 there are no diabetes events among persons with diabetes.

| Status      | Diabetes cases |         | Deaths by cause |         |         |         | All     | P-years   |
|-------------|----------------|---------|-----------------|---------|---------|---------|---------|-----------|
|             | T1D            | T2D     | CVD             | Cancer  | Respir  | Other   |         |           |
| Period      |                |         |                 |         |         |         |         |           |
| No diabetes |                |         |                 |         |         |         |         |           |
| 1996-1998   | 3,478          | 33,986  | 58,088          | 42,494  | 15,170  | 43,916  | 159,668 | 15,623.6  |
| 1999-2001   | 2,994          | 36,887  | 55,457          | 42,406  | 14,917  | 41,430  | 154,210 | 15,726.0  |
| 2002-2004   | 2,816          | 49,185  | 50,897          | 40,506  | 15,295  | 41,733  | 148,431 | 15,808.1  |
| 2005-2007   | 2,780          | 44,326  | 42,956          | 40,444  | 14,122  | 42,943  | 140,465 | 15,872.1  |
| 2008-2010   | 2,734          | 56,453  | 36,812          | 39,304  | 15,031  | 44,762  | 135,909 | 16,019.6  |
| 2011-2013   | 2,477          | 69,728  | 31,855          | 39,093  | 14,811  | 40,947  | 126,706 | 16,105.7  |
| 2014-2016   | 2,433          | 53,387  | 29,588          | 38,229  | 14,137  | 41,226  | 123,180 | 16,301.0  |
| 1996-2016   | 19,712         | 343,952 | 305,653         | 282,476 | 103,483 | 296,957 | 988,569 | 111,456.1 |
| T1D         |                |         |                 |         |         |         |         |           |
| 1996-1998   | .              | .       | 868             | 290     | 137     | 671     | 1,966   | 68.1      |
| 1999-2001   | .              | .       | 997             | 365     | 130     | 643     | 2,135   | 71.2      |
| 2002-2004   | .              | .       | 835             | 333     | 175     | 860     | 2,203   | 73.1      |
| 2005-2007   | .              | .       | 610             | 397     | 137     | 950     | 2,094   | 74.4      |
| 2008-2010   | .              | .       | 501             | 402     | 183     | 803     | 1,889   | 73.3      |
| 2011-2013   | .              | .       | 348             | 284     | 157     | 643     | 1,432   | 71.0      |
| 2014-2016   | .              | .       | 243             | 237     | 113     | 450     | 1,043   | 70.0      |
| 1996-2016   | .              | .       | 4,402           | 2,308   | 1,032   | 5,020   | 12,762  | 501.1     |
| T2D         |                |         |                 |         |         |         |         |           |
| 1996-2016   | .              | .       | 4,402           | 2,308   | 1,032   | 5,020   | 12,762  | 501.1     |
| 1996-1998   | .              | .       | 8,133           | 2,788   | 1,114   | 3,564   | 15,599  | 212.6     |
| 1999-2001   | .              | .       | 8,559           | 3,556   | 1,294   | 4,005   | 17,414  | 269.6     |
| 2002-2004   | .              | .       | 8,084           | 4,025   | 1,860   | 5,199   | 19,168  | 341.0     |
| 2005-2007   | .              | .       | 7,485           | 4,760   | 1,973   | 6,414   | 20,632  | 421.0     |
| 2008-2010   | .              | .       | 7,080           | 5,508   | 2,562   | 7,416   | 22,566  | 502.6     |
| 2011-2013   | .              | .       | 7,546           | 6,704   | 3,013   | 7,907   | 25,170  | 631.1     |
| 2014-2016   | .              | .       | 7,850           | 7,965   | 3,584   | 9,052   | 28,451  | 718.1     |
| 1996-2016   | .              | .       | 54,737          | 35,306  | 15,400  | 43,557  | 149,000 | 3,096.0   |
