# Supplementary material for: Lifetime risk and years lost to type 1 and type 2 diabetes in Denmark, 1996–2016
Source: PubMed Central journal article supplement — BMJ Open Diabetes Res Care. 2021 Mar 2;9(1):e001065. doi: 10.1136/bmjdrc-2019-001065 (PMC7929801; doi:10.1136/bmjdrc-2019-001065), 2021-03-02
Supplement: bmjdrc-2019-001065supp011.pdf [file bmjdrc-2019-001065supp011.pdf]

Table ESM 2 Number of deaths in Denmark 1996–2016 by cause of death (10 groups)

|      | Other causes |         |         |        |        |        |        |         |       |        |
|------|--------------|---------|---------|--------|--------|--------|--------|---------|-------|--------|
|      | CVD          | Cancer  | Respir  | Diab   | Digest | Extern | Infect | Other   | Renal | Urinal |
| All  | 360,278      | 322,704 | 118,944 | 27,196 | 55,029 | 54,769 | 15,277 | 192,737 | 6,989 | 9,831  |
| 1996 | 22,542       | 15,216  | 5,691   | 629    | 2,428  | 3,371  | 530    | 10,030  | 195   | 405    |
| 1997 | 22,001       | 15,258  | 5,431   | 1,093  | 2,847  | 3,536  | 374    | 8,718   | 190   | 444    |
| 1998 | 21,270       | 15,180  | 5,284   | 1,195  | 2,804  | 3,409  | 350    | 7,894   | 223   | 451    |
| 1999 | 21,458       | 15,445  | 5,628   | 1,367  | 2,886  | 3,441  | 463    | 7,330   | 242   | 460    |
| 2000 | 20,535       | 15,486  | 5,227   | 1,434  | 2,801  | 3,357  | 374    | 7,346   | 238   | 429    |
| 2001 | 20,915       | 15,506  | 5,363   | 1,378  | 2,814  | 3,082  | 390    | 7,695   | 246   | 432    |
| 2002 | 20,447       | 14,967  | 5,822   | 1,462  | 2,830  | 2,593  | 732    | 8,611   | 373   | 484    |
| 2003 | 19,834       | 14,926  | 5,860   | 1,360  | 2,742  | 2,543  | 845    | 8,280   | 439   | 514    |
| 2004 | 18,559       | 15,217  | 5,420   | 1,289  | 2,759  | 2,434  | 812    | 8,177   | 398   | 544    |
| 2005 | 17,642       | 15,286  | 5,228   | 1,333  | 2,867  | 2,582  | 725    | 8,135   | 359   | 540    |
| 2006 | 17,001       | 15,636  | 5,261   | 1,306  | 2,924  | 2,672  | 799    | 8,589   | 383   | 627    |
| 2007 | 16,080       | 15,128  | 5,661   | 1,311  | 2,677  | 2,525  | 874    | 10,130  | 402   | 508    |
| 2008 | 15,119       | 15,231  | 5,639   | 1,297  | 2,758  | 2,468  | 720    | 10,253  | 314   | 462    |
| 2009 | 14,852       | 15,096  | 6,149   | 1,349  | 2,769  | 2,270  | 831    | 10,315  | 333   | 493    |
| 2010 | 14,492       | 15,384  | 5,850   | 1,257  | 2,718  | 2,067  | 918    | 10,627  | 394   | 408    |
| 2011 | 13,475       | 15,529  | 5,846   | 1,377  | 2,478  | 2,198  | 812    | 9,562   | 334   | 458    |
| 2012 | 13,419       | 15,786  | 5,861   | 1,338  | 2,306  | 2,144  | 919    | 9,615   | 398   | 373    |
| 2013 | 12,878       | 15,414  | 6,126   | 1,327  | 2,203  | 2,098  | 1,010  | 10,073  | 398   | 463    |
| 2014 | 12,489       | 15,605  | 5,674   | 1,320  | 2,229  | 2,105  | 924    | 9,775   | 364   | 456    |
| 2015 | 12,805       | 15,658  | 5,973   | 1,372  | 2,112  | 1,951  | 969    | 10,507  | 355   | 463    |
| 2016 | 12,464       | 15,744  | 5,950   | 1,401  | 2,077  | 1,923  | 906    | 11,074  | 411   | 417    |
