# Supplementary material for: Lifetime risk and years lost to type 1 and type 2 diabetes in Denmark, 1996–2016
Source: PubMed Central journal article supplement — BMJ Open Diabetes Res Care. 2021 Mar 2;9(1):e001065. doi: 10.1136/bmjdrc-2019-001065 (PMC7929801; doi:10.1136/bmjdrc-2019-001065), 2021-03-02
Supplement: bmjdrc-2019-001065supp012.pdf [file bmjdrc-2019-001065supp012.pdf]

Table ESM 3: *Future years of life lost (1000s) among currently prevalent diabetes patients in Denmark at 1 January each year, and average years of life lost per person among these. Note that only every 3 January is shown.*

|       | Date | Total YLL (1000s) |       |       | Average YLL |     |
|-------|------|-------------------|-------|-------|-------------|-----|
|       |      | T1D               | T2D   | DM    | T1D         | T2D |
| Men   | 1996 | 85.1              | 149.4 | 234.4 | 6.9         | 4.9 |
|       | 1999 | 110.9             | 188.2 | 299.2 | 8.4         | 4.6 |
|       | 2002 | 129.8             | 222.8 | 352.6 | 9.5         | 4.3 |
|       | 2005 | 138.8             | 266.8 | 405.6 | 9.9         | 3.9 |
|       | 2008 | 148.1             | 276.8 | 424.9 | 10.3        | 3.4 |
|       | 2011 | 141.4             | 310.5 | 451.8 | 9.6         | 3.1 |
|       | 2014 | 121.2             | 377.9 | 499.1 | 8.0         | 3.0 |
|       | 2017 | 99.9              | 428.5 | 528.4 | 6.4         | 3.1 |
| Women | 1996 | 74.7              | 150.6 | 225.3 | 7.8         | 4.8 |
|       | 1999 | 86.6              | 173.5 | 260.2 | 8.6         | 4.4 |
|       | 2002 | 94.8              | 192.6 | 287.3 | 9.1         | 4.1 |
|       | 2005 | 102.2             | 223.3 | 325.5 | 9.7         | 3.7 |
|       | 2008 | 108.5             | 225.4 | 334.0 | 10.0        | 3.2 |
|       | 2011 | 103.2             | 248.4 | 351.7 | 9.3         | 3.0 |
|       | 2014 | 92.7              | 303.7 | 396.3 | 8.1         | 2.9 |
|       | 2017 | 81.9              | 337.3 | 419.2 | 6.9         | 3.0 |
| M+W   | 1996 | 159.8             | 300.0 | 459.7 | 7.3         | 4.9 |
|       | 1999 | 197.6             | 361.8 | 559.3 | 8.5         | 4.5 |
|       | 2002 | 224.6             | 415.4 | 639.9 | 9.3         | 4.2 |
|       | 2005 | 241.0             | 490.1 | 731.1 | 9.8         | 3.8 |
|       | 2008 | 256.7             | 502.2 | 758.8 | 10.2        | 3.3 |
|       | 2011 | 244.6             | 558.9 | 803.5 | 9.5         | 3.0 |
|       | 2014 | 213.9             | 681.5 | 895.4 | 8.0         | 3.0 |
|       | 2017 | 181.8             | 765.8 | 947.6 | 6.6         | 3.0 |
