# Supplementary material for: Lifetime risk and years lost to type 1 and type 2 diabetes in Denmark, 1996–2016
Source: PubMed Central journal article supplement — BMJ Open Diabetes Res Care. 2021 Mar 2;9(1):e001065. doi: 10.1136/bmjdrc-2019-001065 (PMC7929801; doi:10.1136/bmjdrc-2019-001065), 2021-03-02
Supplement: bmjdrc-2019-001065supp014.pdf [file bmjdrc-2019-001065supp014.pdf]

Table ESM 5 Years of life lost to type 1 diabetes in the Danish population by cause of death at different dates and ages. Dates refer to 1 January every year.

| Date | Age | CVD |     | Cancer |      | Respir. |      | Other |     | All causes |      |
|------|-----|-----|-----|--------|------|---------|------|-------|-----|------------|------|
|      |     | M   | W   | M      | W    | M       | W    | M     | W   | M          | W    |
| 1996 | 20  | 3.4 | 6.2 | -2.0   | -1.3 | 0.4     | -0.1 | 7.9   | 6.4 | 9.7        | 11.2 |
|      | 30  | 3.5 | 6.2 | -2.0   | -1.1 | 0.4     | -0.1 | 7.3   | 5.7 | 9.3        | 10.6 |
|      | 40  | 3.7 | 6.1 | -1.9   | -1.0 | 0.4     | -0.1 | 6.1   | 4.7 | 8.3        | 9.7  |
|      | 50  | 4.0 | 5.7 | -1.6   | -0.8 | 0.5     | -0.2 | 3.6   | 3.6 | 6.6        | 8.3  |
|      | 60  | 4.2 | 5.0 | -1.3   | -0.7 | 0.4     | -0.4 | 1.4   | 2.3 | 4.7        | 6.4  |
|      | 70  | 3.4 | 3.7 | -1.2   | -0.4 | 0.1     | -0.5 | 0.4   | 1.3 | 2.7        | 4.1  |
|      | 80  | 1.7 | 1.8 | -0.8   | 0.0  | 0.2     | -0.4 | -0.1  | 0.6 | 1.1        | 2.0  |
| 1999 | 20  | 4.4 | 6.2 | -2.2   | -1.0 | 0.0     | 0.0  | 9.4   | 6.5 | 11.6       | 11.8 |
|      | 30  | 4.5 | 6.3 | -2.1   | -0.9 | 0.0     | 0.0  | 8.7   | 5.8 | 11.1       | 11.2 |
|      | 40  | 4.6 | 6.2 | -2.0   | -0.7 | 0.0     | 0.0  | 7.4   | 4.9 | 10.0       | 10.3 |
|      | 50  | 4.9 | 5.8 | -1.7   | -0.5 | 0.1     | -0.1 | 4.9   | 3.8 | 8.2        | 9.1  |
|      | 60  | 5.1 | 5.2 | -1.4   | -0.5 | 0.0     | -0.2 | 2.3   | 2.6 | 6.1        | 7.1  |
|      | 70  | 4.2 | 4.1 | -1.2   | -0.5 | -0.2    | -0.3 | 1.0   | 1.6 | 3.7        | 4.9  |
|      | 80  | 2.3 | 2.2 | -0.8   | -0.1 | 0.0     | -0.3 | 0.3   | 0.8 | 1.8        | 2.6  |
| 2002 | 20  | 4.3 | 5.7 | -2.1   | -0.6 | -0.3    | 0.2  | 11.0  | 6.9 | 12.9       | 12.2 |
|      | 30  | 4.4 | 5.7 | -2.0   | -0.4 | -0.3    | 0.2  | 10.2  | 6.1 | 12.3       | 11.6 |
|      | 40  | 4.6 | 5.7 | -1.9   | -0.3 | -0.3    | 0.1  | 8.7   | 5.2 | 11.1       | 10.8 |
|      | 50  | 4.8 | 5.4 | -1.6   | -0.1 | -0.2    | 0.1  | 6.3   | 4.1 | 9.3        | 9.5  |
|      | 60  | 4.9 | 4.9 | -1.2   | -0.2 | -0.2    | 0.0  | 3.4   | 3.0 | 6.9        | 7.7  |
|      | 70  | 4.1 | 4.0 | -1.1   | -0.5 | -0.4    | -0.1 | 1.8   | 2.0 | 4.4        | 5.4  |
|      | 80  | 2.3 | 2.3 | -0.8   | -0.1 | -0.1    | -0.2 | 0.9   | 1.1 | 2.3        | 3.1  |
| 2005 | 20  | 2.5 | 4.2 | -1.4   | 0.1  | -0.2    | 0.3  | 12.6  | 8.0 | 13.5       | 12.7 |
|      | 30  | 2.6 | 4.3 | -1.3   | 0.2  | -0.2    | 0.3  | 11.8  | 7.2 | 12.9       | 12.0 |
|      | 40  | 2.7 | 4.2 | -1.1   | 0.4  | -0.2    | 0.3  | 10.2  | 6.2 | 11.6       | 11.2 |
|      | 50  | 2.8 | 4.1 | -0.8   | 0.6  | -0.1    | 0.3  | 7.8   | 5.1 | 9.7        | 9.9  |
|      | 60  | 3.0 | 3.7 | -0.4   | 0.4  | 0.0     | 0.2  | 4.8   | 3.8 | 7.3        | 8.1  |
|      | 70  | 2.4 | 3.2 | -0.5   | -0.2 | -0.1    | 0.1  | 2.9   | 2.8 | 4.8        | 5.8  |
|      | 80  | 1.3 | 1.9 | -0.5   | -0.1 | 0.1     | 0.0  | 1.6   | 1.7 | 2.6        | 3.5  |

Table ESM 5(cont.) Years of life lost to type 1 diabetes in the entire Danish population cause of death at different dates and Ages refer to 1 January every year.

| Date | Age | CVD |     | Cancer |      | Respir. |     | Other |     | All causes |      |
|------|-----|-----|-----|--------|------|---------|-----|-------|-----|------------|------|
|      |     | M   | W   | M      | W    | M       | W   | M     | W   | M          | W    |
| 2008 | 20  | 1.3 | 3.0 | -0.3   | 0.5  | 0.1     | 0.5 | 12.8  | 8.9 | 13.9       | 12.9 |
|      | 30  | 1.3 | 3.0 | -0.2   | 0.7  | 0.1     | 0.5 | 12.0  | 8.1 | 13.2       | 12.2 |
|      | 40  | 1.4 | 3.0 | 0.0    | 0.9  | 0.1     | 0.5 | 10.4  | 7.0 | 12.0       | 11.4 |
|      | 50  | 1.5 | 2.9 | 0.3    | 1.0  | 0.2     | 0.4 | 8.1   | 5.8 | 10.1       | 10.2 |
|      | 60  | 1.5 | 2.7 | 0.6    | 0.9  | 0.2     | 0.4 | 5.5   | 4.5 | 7.8        | 8.4  |
|      | 70  | 1.2 | 2.3 | 0.4    | 0.1  | 0.3     | 0.3 | 3.4   | 3.5 | 5.3        | 6.2  |
|      | 80  | 0.5 | 1.5 | 0.0    | -0.1 | 0.4     | 0.2 | 2.0   | 2.3 | 2.9        | 3.9  |
| 2011 | 20  | 1.3 | 2.4 | 0.1    | 0.6  | 0.4     | 0.7 | 10.9  | 8.0 | 12.6       | 11.7 |
|      | 30  | 1.3 | 2.5 | 0.2    | 0.7  | 0.4     | 0.7 | 10.2  | 7.3 | 12.0       | 11.1 |
|      | 40  | 1.4 | 2.5 | 0.3    | 0.9  | 0.4     | 0.7 | 8.9   | 6.4 | 11.0       | 10.4 |
|      | 50  | 1.4 | 2.4 | 0.6    | 1.0  | 0.4     | 0.6 | 7.0   | 5.3 | 9.4        | 9.4  |
|      | 60  | 1.3 | 2.2 | 0.8    | 0.9  | 0.4     | 0.6 | 5.1   | 4.2 | 7.5        | 7.9  |
|      | 70  | 0.9 | 1.9 | 0.5    | 0.1  | 0.5     | 0.5 | 3.3   | 3.3 | 5.2        | 5.9  |
|      | 80  | 0.3 | 1.3 | 0.1    | -0.2 | 0.6     | 0.5 | 1.9   | 2.2 | 2.8        | 3.8  |
| 2014 | 20  | 1.8 | 2.2 | -0.4   | 0.4  | 0.6     | 0.9 | 8.4   | 6.6 | 10.4       | 10.0 |
|      | 30  | 1.8 | 2.2 | -0.3   | 0.4  | 0.6     | 0.9 | 7.9   | 6.0 | 10.0       | 9.5  |
|      | 40  | 1.8 | 2.2 | -0.2   | 0.6  | 0.6     | 0.8 | 7.0   | 5.3 | 9.1        | 9.0  |
|      | 50  | 1.8 | 2.1 | 0.0    | 0.7  | 0.6     | 0.8 | 5.6   | 4.5 | 7.9        | 8.1  |
|      | 60  | 1.5 | 2.0 | 0.0    | 0.6  | 0.5     | 0.7 | 4.3   | 3.6 | 6.4        | 6.9  |
|      | 70  | 1.0 | 1.7 | -0.1   | 0.1  | 0.6     | 0.7 | 3.0   | 2.9 | 4.5        | 5.4  |
|      | 80  | 0.4 | 1.2 | -0.3   | -0.3 | 0.7     | 0.7 | 1.8   | 1.9 | 2.5        | 3.5  |
| 2017 | 20  | 2.1 | 1.9 | -1.0   | 0.1  | 0.7     | 1.0 | 6.4   | 5.4 | 8.2        | 8.4  |
|      | 30  | 2.1 | 1.9 | -1.0   | 0.1  | 0.7     | 1.0 | 6.1   | 5.0 | 7.9        | 8.0  |
|      | 40  | 2.1 | 1.9 | -0.9   | 0.2  | 0.7     | 1.0 | 5.4   | 4.4 | 7.3        | 7.6  |
|      | 50  | 2.0 | 1.9 | -0.8   | 0.3  | 0.7     | 1.0 | 4.4   | 3.8 | 6.3        | 6.9  |
|      | 60  | 1.7 | 1.7 | -0.7   | 0.3  | 0.6     | 0.9 | 3.5   | 3.1 | 5.2        | 6.0  |
|      | 70  | 1.2 | 1.5 | -0.8   | -0.1 | 0.6     | 0.8 | 2.7   | 2.5 | 3.7        | 4.7  |
|      | 80  | 0.5 | 1.1 | -0.6   | -0.4 | 0.7     | 0.8 | 1.6   | 1.6 | 2.2        | 3.2  |
