# Supplementary material for: Lifetime risk and years lost to type 1 and type 2 diabetes in Denmark, 1996–2016
Source: PubMed Central journal article supplement — BMJ Open Diabetes Res Care. 2021 Mar 2;9(1):e001065. doi: 10.1136/bmjdrc-2019-001065 (PMC7929801; doi:10.1136/bmjdrc-2019-001065), 2021-03-02
Supplement: bmjdrc-2019-001065supp015.pdf [file bmjdrc-2019-001065supp015.pdf]

Table ESM 6 Years of life lost to type 2 diabetes in the Danish population by cause of death at different dates and ages. Dates refer to 1 January every year.

| Date | Age | CVD |     | Cancer |     | Respir. |      | Other |      | All causes |      |
|------|-----|-----|-----|--------|-----|---------|------|-------|------|------------|------|
|      |     | M   | W   | M      | W   | M       | W    | M     | W    | M          | W    |
| 1996 | 20  | 6.8 | 6.6 | -0.6   | 1.0 | -0.7    | -0.1 | 6.4   | 3.8  | 11.9       | 11.3 |
|      | 30  | 6.8 | 6.4 | -0.4   | 1.0 | -0.6    | -0.1 | 5.2   | 3.3  | 10.9       | 10.6 |
|      | 40  | 6.6 | 6.1 | -0.3   | 1.0 | -0.6    | -0.2 | 3.8   | 2.6  | 9.5        | 9.5  |
|      | 50  | 6.3 | 5.9 | -0.2   | 0.7 | -0.6    | -0.2 | 2.2   | 1.7  | 7.7        | 8.1  |
|      | 60  | 5.8 | 5.6 | -0.3   | 0.2 | -0.6    | -0.3 | 0.8   | 0.8  | 5.7        | 6.3  |
|      | 70  | 4.7 | 4.9 | -0.3   | 0.0 | -0.5    | -0.3 | -0.1  | -0.1 | 3.8        | 4.5  |
|      | 80  | 2.9 | 3.0 | -0.3   | 0.0 | -0.3    | -0.1 | -0.3  | -0.3 | 2.0        | 2.5  |
| 1999 | 20  | 5.2 | 5.1 | -0.3   | 1.1 | -0.5    | 0.0  | 6.6   | 3.9  | 11.1       | 10.2 |
|      | 30  | 5.2 | 4.9 | -0.2   | 1.2 | -0.5    | 0.0  | 5.5   | 3.5  | 10.0       | 9.6  |
|      | 40  | 5.0 | 4.7 | 0.0    | 1.1 | -0.4    | 0.0  | 4.1   | 2.8  | 8.7        | 8.6  |
|      | 50  | 4.8 | 4.5 | 0.0    | 0.8 | -0.4    | 0.0  | 2.7   | 2.0  | 7.1        | 7.3  |
|      | 60  | 4.5 | 4.3 | -0.1   | 0.4 | -0.4    | -0.1 | 1.3   | 1.2  | 5.2        | 5.7  |
|      | 70  | 3.6 | 3.9 | -0.2   | 0.0 | -0.4    | -0.2 | 0.4   | 0.3  | 3.4        | 4.0  |
|      | 80  | 2.3 | 2.4 | -0.2   | 0.0 | -0.2    | -0.1 | 0.0   | 0.0  | 1.9        | 2.3  |
| 2002 | 20  | 4.0 | 3.8 | -0.1   | 1.2 | -0.3    | 0.2  | 6.8   | 4.0  | 10.3       | 9.3  |
|      | 30  | 3.9 | 3.7 | 0.0    | 1.2 | -0.3    | 0.2  | 5.7   | 3.6  | 9.3        | 8.7  |
|      | 40  | 3.8 | 3.5 | 0.2    | 1.2 | -0.3    | 0.2  | 4.3   | 3.0  | 8.1        | 7.8  |
|      | 50  | 3.6 | 3.4 | 0.2    | 0.9 | -0.2    | 0.1  | 2.9   | 2.2  | 6.5        | 6.6  |
|      | 60  | 3.3 | 3.2 | 0.1    | 0.5 | -0.2    | 0.0  | 1.7   | 1.4  | 4.9        | 5.1  |
|      | 70  | 2.6 | 2.9 | -0.1   | 0.1 | -0.2    | -0.1 | 0.8   | 0.7  | 3.2        | 3.6  |
|      | 80  | 1.7 | 1.9 | -0.2   | 0.0 | -0.1    | 0.0  | 0.4   | 0.3  | 1.8        | 2.1  |
| 2005 | 20  | 3.0 | 2.7 | 0.1    | 1.3 | -0.2    | 0.3  | 6.4   | 3.9  | 9.4        | 8.3  |
|      | 30  | 3.0 | 2.6 | 0.2    | 1.3 | -0.1    | 0.3  | 5.4   | 3.5  | 8.5        | 7.8  |
|      | 40  | 2.9 | 2.5 | 0.4    | 1.3 | -0.1    | 0.3  | 4.1   | 2.9  | 7.3        | 7.0  |
|      | 50  | 2.8 | 2.4 | 0.4    | 1.0 | -0.1    | 0.3  | 2.8   | 2.3  | 5.9        | 5.9  |
|      | 60  | 2.5 | 2.3 | 0.2    | 0.6 | 0.0     | 0.2  | 1.8   | 1.5  | 4.4        | 4.6  |
|      | 70  | 2.0 | 2.0 | 0.0    | 0.2 | 0.0     | 0.1  | 1.0   | 0.9  | 3.0        | 3.2  |
|      | 80  | 1.3 | 1.4 | -0.2   | 0.0 | 0.0     | 0.0  | 0.5   | 0.5  | 1.7        | 1.9  |

Table ESM 6 (cont.) Years of life lost to type 2 diabetes in the Danish population by cause of death at different dates and ages. Dates refer to 1 January every year.

| Date | Age | CVD |     | Cancer |     | Respir. |     | Other |     | All causes |     |
|------|-----|-----|-----|--------|-----|---------|-----|-------|-----|------------|-----|
|      |     | M   | W   | M      | W   | M       | W   | M     | W   | M          | W   |
| 2008 | 20  | 2.3 | 1.8 | 0.3    | 1.4 | 0.0     | 0.5 | 5.6   | 3.6 | 8.2        | 7.3 |
|      | 30  | 2.3 | 1.8 | 0.5    | 1.4 | 0.0     | 0.5 | 4.6   | 3.2 | 7.4        | 6.9 |
|      | 40  | 2.2 | 1.7 | 0.6    | 1.4 | 0.1     | 0.4 | 3.5   | 2.7 | 6.4        | 6.2 |
|      | 50  | 2.1 | 1.6 | 0.6    | 1.1 | 0.1     | 0.4 | 2.4   | 2.1 | 5.1        | 5.2 |
|      | 60  | 1.9 | 1.6 | 0.4    | 0.7 | 0.1     | 0.3 | 1.5   | 1.5 | 3.9        | 4.0 |
|      | 70  | 1.5 | 1.4 | 0.1    | 0.2 | 0.1     | 0.2 | 0.9   | 0.9 | 2.6        | 2.7 |
|      | 80  | 0.9 | 1.0 | -0.1   | 0.0 | 0.1     | 0.1 | 0.5   | 0.6 | 1.4        | 1.6 |
| 2011 | 20  | 1.9 | 1.4 | 0.5    | 1.5 | 0.1     | 0.6 | 4.8   | 3.2 | 7.4        | 6.7 |
|      | 30  | 1.9 | 1.4 | 0.6    | 1.5 | 0.1     | 0.6 | 4.0   | 2.8 | 6.7        | 6.3 |
|      | 40  | 1.8 | 1.3 | 0.7    | 1.4 | 0.2     | 0.6 | 3.0   | 2.4 | 5.7        | 5.7 |
|      | 50  | 1.7 | 1.3 | 0.7    | 1.2 | 0.2     | 0.5 | 2.0   | 1.9 | 4.6        | 4.8 |
|      | 60  | 1.6 | 1.2 | 0.5    | 0.8 | 0.2     | 0.4 | 1.3   | 1.3 | 3.5        | 3.7 |
|      | 70  | 1.2 | 1.1 | 0.2    | 0.3 | 0.2     | 0.3 | 0.8   | 0.8 | 2.5        | 2.5 |
|      | 80  | 0.7 | 0.7 | -0.1   | 0.0 | 0.2     | 0.2 | 0.5   | 0.6 | 1.3        | 1.5 |
| 2014 | 20  | 1.9 | 1.3 | 0.7    | 1.8 | 0.2     | 0.7 | 4.4   | 2.8 | 7.2        | 6.6 |
|      | 30  | 1.9 | 1.2 | 0.8    | 1.7 | 0.2     | 0.7 | 3.6   | 2.5 | 6.5        | 6.2 |
|      | 40  | 1.8 | 1.2 | 0.9    | 1.7 | 0.2     | 0.7 | 2.7   | 2.1 | 5.6        | 5.6 |
|      | 50  | 1.7 | 1.1 | 0.9    | 1.4 | 0.2     | 0.6 | 1.8   | 1.7 | 4.6        | 4.8 |
|      | 60  | 1.5 | 1.1 | 0.6    | 0.9 | 0.2     | 0.6 | 1.1   | 1.2 | 3.6        | 3.7 |
|      | 70  | 1.2 | 0.9 | 0.3    | 0.5 | 0.2     | 0.4 | 0.8   | 0.7 | 2.5        | 2.6 |
|      | 80  | 0.7 | 0.6 | 0.0    | 0.0 | 0.2     | 0.3 | 0.5   | 0.6 | 1.4        | 1.5 |
| 2017 | 20  | 1.9 | 1.2 | 1.0    | 2.1 | 0.2     | 0.8 | 4.1   | 2.5 | 7.2        | 6.5 |
|      | 30  | 1.9 | 1.1 | 1.1    | 2.1 | 0.2     | 0.8 | 3.4   | 2.2 | 6.5        | 6.2 |
|      | 40  | 1.8 | 1.1 | 1.1    | 2.0 | 0.2     | 0.8 | 2.6   | 1.9 | 5.7        | 5.7 |
|      | 50  | 1.7 | 1.0 | 1.1    | 1.7 | 0.2     | 0.7 | 1.7   | 1.5 | 4.7        | 4.9 |
|      | 60  | 1.6 | 1.0 | 0.8    | 1.2 | 0.2     | 0.7 | 1.1   | 1.0 | 3.7        | 3.8 |
|      | 70  | 1.2 | 0.8 | 0.4    | 0.7 | 0.2     | 0.5 | 0.8   | 0.6 | 2.7        | 2.7 |
|      | 80  | 0.8 | 0.6 | 0.0    | 0.2 | 0.2     | 0.3 | 0.6   | 0.5 | 1.6        | 1.6 |
